# Supplementary material for: Modeling cyanobacteria life cycle dynamics and historical nitrogen fixation in the Baltic Proper
Source: Copernicus journal article supplement (doi:10.5194/bg-18-6213-2021), 2021-12-01
Supplement: Supplementary file 1 [file bg-18-6213-2021-supplement.pdf]

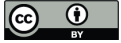

*Supplement of*

## **Modeling cyanobacteria life cycle dynamics and historical nitrogen fixation in the Baltic Proper**

**Jenny Hieronymus et al.**

*Correspondence to:* Jenny Hieronymus ([jenny.hieronymus@smhi.se](mailto:jenny.hieronymus@smhi.se))

The copyright of individual parts of the supplement might differ from the article licence.

**Table S1**

A list of the cyanobacteria life cycle model variables. Note the different units of pelagic and benthic variables.

| State variables* | Description                                                          | Units                      |
|------------------|----------------------------------------------------------------------|----------------------------|
| HET              | Vegetative cells with heterocysts, cyanobacteria N-fixing stage.     | mmol N m <sup>-3</sup>     |
| AKIW             | Akinetes, cyanobacteria resting stage in the water column            | mmol N m <sup>-3</sup>     |
| REC              | Recruiting cells with gas vesicles, cyanobacteria non-N-fixing stage | mmol N m <sup>-3</sup>     |
| AKIB             | Akinetes, cyanobacteria resting stage in the sediment                | mmol N m <sup>-2</sup>     |
| NO3              | Nitrate                                                              | mmol NO3-N m <sup>-3</sup> |
| PO4              | Phosphate                                                            | mmol PO4-P m <sup>-3</sup> |
| DETP             | Phosphorus detritus (dead organic matter)                            | mmol DET-P m <sup>-3</sup> |
| TEM              | Temperature                                                          | °C                         |
| SAL              | Salinity                                                             | g kg <sup>-1</sup>         |
| IZ               | Photosynthetically active radiation (at depth Z)                     | W m <sup>-2</sup>          |
| τ                | Bottom shear stress                                                  | N m <sup>-2</sup>          |
| AREA             | Horizontal area of a grid cell                                       | m <sup>2</sup>             |
| VOLUME           | Volume of a grid cell                                                | m <sup>3</sup>             |

\*) Only variables relevant for the present description of the cyanobacteria life cycle model are shown in this Appendix. See Eilola et al. (2009) and Almroth-Rosell et al. (2011) for a comprehensive list of biogeochemical variables in SCOBI and Hense and Beckmann (2006; 2010) for a more detailed description of the cyanobacteria life cycle components.

**Table S2**

The source terms describing the change in time for each variable of the life cycle model equations are described and valid for each discrete depth layer in the model. Mass conservation checks may constrain the numerical solutions in SCOBI. The uptake of nutrients as well as the mass content of carbon, nitrogen and phosphorus in the live and dead HET, REC, AKIW and AKIB follows the standard Redfield ratio molecular stoichiometry of phytoplankton C:N:P=106:16:1.

### Mathematical formulation

$$S_{HET} = GROWTH_{HET} + REC2HET + RISEI_{HET} - RISEO_{HET} - HET2AKIW - MORT_{HET}$$

$$S_{REC} = GROWTH_{REC} + AKIW2REC + BOT \cdot AKIB2REC + RISEI_{REC} - RISEO_{REC} - REC2HET - MOI$$

$$S_{AKIW} = HET2AKIW + SINKI_{AKIW} + BOT \cdot RESUSP_{AKIB} - SINKO_{AKIW} - AKIW2REC$$

$$S_{AKIB} = SINKI_{AKIB} - AKIB2REC - BUR_{AKIB} - RESUSP_{AKIB}$$

The ratio  $BOT = \frac{BOTTOMAREA}{VOLUME}$  between sediment area and the volume of water in the overlying cell is used for the transfer of mass fluxes from the sediment to the water column.

**Table S3**Mathematical formulation of sources and sinks

$$GROWTH_{HET} = DIP_{GROWTH_{HET}} + DETP_{GROWTH_{HET}} \quad (1)$$

$$DIP_{GROWTH_{HET}} = DIPLIM_{HET} \cdot GR_{HET} \cdot HET \quad (2)$$

$$DETP_{GROWTH_{HET}} = DETPLIM_{HET} \cdot (1 - DIPLIM_{HET}) \cdot GR_{HET} \cdot HET \quad (3) \text{Table}$$

$$DIPLIM_{HET} = \frac{PO4}{KDIP+PO4} \quad (4)$$

$$DETPLIM_{HET} = \frac{DETP}{KDOP+DETP} \quad (5)$$

$$GR_{HET} = SLIM_{HET} \cdot TLIM_{HET} \cdot LTLIM_{HET} \cdot GRMAX_{HET} \quad (6)$$

$$SLIM_{HET} = 1.0 \text{ if } (3 < SA1 \leq 10); \text{ else } = 0.0 \quad (7)$$

$$TLIM_{HET} = \frac{1}{45.0} + \exp \left\{ - \left( \frac{(TEM-27.5)}{(4.0 - \text{sign}\{9, TEM-27.5\})} \right)^4 \right\}, \quad (8)^*$$

where  $\text{sign}\{9, TEM-27.5\} = 9$  if  $TEM \geq 27.5$ ; else  $\text{sign}\{9, TEM-27.5\} = -9$

$$LTLIM_{HET} = \frac{PI_{SLOPE} \cdot IZ}{\sqrt{(GRMAX_{HET} \cdot TLIM_{HET})^2 + (PI_{SLOPE} \cdot IZ)^2}} \quad (9)^{**}$$

$$GRMAX_{HET} = 2.78 \times 10^{-6}$$

$$PI_{SLOPE} = 4.63 \times 10^{-7}$$

$$REC2HET = 1.16 \times 10^{-5} \cdot REC \text{ if } GROWTH_{REC} < GROWTH_{HET}; \text{ else } = 0.0 \quad (10)$$

$$HET2AKIW = 4.63 \times 10^{-5} \cdot TLIM_{HET} \cdot HET \text{ if } IZ > 0.0 \quad (11)$$

and  $GROWTH_{HET} < GCRIT_{HET}; \text{ else } = 0$

$$GCRIT_{HET} = 3.5 \cdot GROWTH_{REC} \quad (12)$$

$$MORT_{HET} = 1.16 \times 10^{-7} \cdot HET \quad (13)$$

$$RISEI_{HET} = WR_{HET} \cdot HET_{BELOW} \quad (14)$$

$$RISEO_{HET} = WR_{HET} \cdot HET \quad (15)$$

$$WR_{HET} = 1.16 \times 10^{-6}$$

$$GROWTH_{REC} = \min(NGROWTH_{REC}, PGROWTH_{REC}) \quad (16)$$

$$NGROWTH_{REC} = NLIM_{REC} \cdot GR_{REC} \cdot REC \quad (17)$$

$$PGROWTH_{REC} = DIP_{GROWTH_{REC}} + DETP_{GROWTH_{REC}} \quad (18)$$

$$DIP_{GROWTH_{REC}} = DIPLIM_{REC} \cdot GR_{REC} \cdot REC \quad (19)$$

$$DETP_{GROWTH_{REC}} = DETPLIM_{REC} \cdot (1 - DIPLIM_{REC}) \cdot GR_{REC} \cdot REC \quad (20)$$

$$NLIM_{REC} = \frac{NO3}{0.3+NO3} \quad (21)$$

$$DIPLIM_{REC} = \frac{PO4}{KDIP+PO4} \quad (22)$$

$$DETPLIM_{REC} = \frac{DETP}{KDOP+DETP} \quad (23)$$

$$GR_{REC} = SLIM_{REC} \cdot TLIM_{REC} \cdot LTLIM_{REC} \cdot GRMAX_{REC} \quad (24)$$

$$SLIM_{REC} = SLIM_{HET} \quad (25)$$

$$TLIM_{REC} = TLIM_{HET} \quad (26)$$

$$LTLIM_{REC} = \frac{PI_{SLOPE} \cdot IZ}{\sqrt{(GRMAX_{REC} \cdot TLIM_{REC})^2 + (PI_{SLOPE} \cdot IZ)^2}} \quad (27)**$$

$$GRMAX_{REC} = 8.33 \times 10^{-6}$$

$$AKIW2REC = 1.16 \times 10^{-5} \cdot SLIM_{REC} \cdot GERMINATE_{AKI} \cdot AKIW \quad (28)$$

$$AKIB2REC = 1.16 \times 10^{-5} \cdot SLIM_{REC} \cdot GERMINATE_{AKI} \cdot AKIB \quad (29)$$

$$GERMINATE_{AKI} = 1.0 \text{ during April 20 to end of April; else } = 0.0 \quad (30)$$

$$MORT_{REC} = 1.16 \times 10^{-7} \cdot REC \text{ if } O_2 > 0 \text{ mll}^{-1}; \text{ else } 0.1 \cdot REC \quad (31)$$

$$RISEI_{REC} = WR_{REC} \cdot REC_{BELOW} \quad (32)$$

$$RISEO_{REC} = WR_{REC} \cdot REC \quad (33)$$

$$WR_{REC} = 1.97 \times 10^{-5}$$

$$SINKI_{AKIW} = WS_{AKI} \cdot AKIW_{ABOVE} \quad (34)$$

$$SINKO_{AKIW} = WS_{AKI} \cdot AKIW \quad (35)$$

$$WS_{AKI} = 1.16 \times 10^{-4}$$

$$RESUSP_{AKIB} = SEDWS \cdot \frac{\tau - \tau_{critical}}{\tau_{critical}} \cdot AKIB \text{ if } \tau > \tau_{critical}; \text{ else } = 0.0 \quad (36)$$

$$SINKI_{AKIB} = WS_{AKI} \cdot AKIW_{ABOVE} \quad (37)$$

$$SEDWS = 1.16 \times 10^{-5}$$

$$\tau_{critical} = 0.1$$

$$BUR_{AKIB} = AKIB \cdot BURRATE^{(1)} \text{ if } SLIM_{REC} = 1; \text{ else } BUR_{AKIB} = AKIB \cdot 10^{15} \cdot BURRATE^{(1)} \quad (38)$$

<sup>1)</sup> Constant burial rate in different Baltic Sea sub basins (Almroth-Rosell et al., 2015).

\*) Fitted to observational data (Lethimäki et al., 1997)

\*\*) From Beckmann and Hense (2004)

**Table S4**

Description of variables

| Name                  | Unit                                   | Description                                                                                                                                                                                                                                                                                                                                                  |
|-----------------------|----------------------------------------|--------------------------------------------------------------------------------------------------------------------------------------------------------------------------------------------------------------------------------------------------------------------------------------------------------------------------------------------------------------|
| $BUR_{AKIB}$          | mmol N m <sup>-2</sup> s <sup>-1</sup> | The permanent immobilization of AKIB in the sediment depends on the sediment burial rates defined in SCOB1. To conserve nutrient mass the immobilized AKIB are transferred to the sediment pools of nitrogen and phosphorus. Very high rate of immobilization is used when the salinity is outside of the preferred salinity range for the recruiting cells. |
| $DETP_{GROWTH_{HET}}$ | mmol N m <sup>-3</sup> s <sup>-1</sup> | Growth of HET based on uptake of P from detritus (DET-P)                                                                                                                                                                                                                                                                                                     |
| $DETP_{GROWTH_{REC}}$ | mmol N m <sup>-3</sup> s <sup>-1</sup> | Growth of REC based on uptake of DETP                                                                                                                                                                                                                                                                                                                        |
| $DETPLIM_{HET}$       | -                                      | DETP limitation of HET growth                                                                                                                                                                                                                                                                                                                                |
| $DETPLIM_{REC}$       | -                                      | DETP limitation of REC growth                                                                                                                                                                                                                                                                                                                                |
| $DIP_{GROWTH_{HET}}$  | mmol N m <sup>-3</sup> s <sup>-1</sup> | Growth of HET based on uptake of PO4                                                                                                                                                                                                                                                                                                                         |
| $DIP_{GROWTH_{REC}}$  | mmol N m <sup>-3</sup> s <sup>-1</sup> | Growth of REC based on uptake of PO4                                                                                                                                                                                                                                                                                                                         |
| $DIPLIM_{HET}$        | -                                      | PO4 limitation of HET growth                                                                                                                                                                                                                                                                                                                                 |
| $DIPLIM_{REC}$        | -                                      | PO4 limitation of REC growth                                                                                                                                                                                                                                                                                                                                 |

|                   |                                      |                                                                                                                                       |
|-------------------|--------------------------------------|---------------------------------------------------------------------------------------------------------------------------------------|
| $GCRIT_{HET}$     | $\text{mmol N m}^{-3} \text{s}^{-1}$ | The critical lowest threshold of HET growth that defines the start of transition from HET to AKIW                                     |
| $GERMINATE_{AKI}$ | -                                    | Limitation of germination to the defined time window in spring                                                                        |
| $GR_{HET}$        | $\text{s}^{-1}$                      | Salinity, temperature and light limited growth rate of HET                                                                            |
| $GRMAX_{HET}$     | $\text{s}^{-1}$                      | Maximum growth rate of HET                                                                                                            |
| $GRMAX_{REC}$     | $\text{s}^{-1}$                      | Maximum growth rate of REC                                                                                                            |
| $GROWTH_{HET}$    | $\text{mmol N m}^{-3} \text{s}^{-1}$ | Growth of HET                                                                                                                         |
| $GROWTH_{REC}$    | $\text{mmol N m}^{-3} \text{s}^{-1}$ | Growth of REC                                                                                                                         |
| $GR_{REC}$        | $\text{s}^{-1}$                      | Salinity, temperature and light limited growth rate of REC                                                                            |
| $LTLIM_{HET}$     | -                                    | Light limitation of HET growth                                                                                                        |
| $LTLIM_{REC}$     | -                                    | Light limitation of REC growth                                                                                                        |
| $MORT_{HET}$      | $\text{mmol N m}^{-3} \text{s}^{-1}$ | Mortality of HET. Dead HET are transferred to the pools of dead organic matter in the model.                                          |
| $MORT_{REC}$      | $\text{mmol N m}^{-3} \text{s}^{-1}$ | Mortality of REC. Higher mortality under anoxic conditions. Dead REC are transferred to the pool of dead organic matter in the model. |
| $NGROWTH_{REC}$   | $\text{mmol N m}^{-3} \text{s}^{-1}$ | Growth of REC based on uptake of nitrogen ( $\text{NO}_3$ )                                                                           |
| $NLIM_{REC}$      | -                                    | $\text{NO}_3$ limitation of REC growth                                                                                                |
| $PGROWTH_{REC}$   | $\text{mmol N m}^{-3} \text{s}^{-1}$ | Growth of REC based on uptake of phosphorus                                                                                           |
| $PI_{SLOPE}$      | $\text{W m}^{-2} \text{s}^{-1}$      | Initial slope of the cyanobacteria PI-curve (photosynthesis-irradiance curve)                                                         |
| $RESUSP_{AKIB}$   | $\text{mmol N m}^{-2} \text{s}^{-1}$ | Uplift by resuspension of AKIB from the sediment to the water column AKIW                                                             |
| $RISEI_{HET}$     | $\text{mmol N m}^{-3} \text{s}^{-1}$ | Uplift of HET from the layer below                                                                                                    |
| $RISEI_{REC}$     | $\text{mmol N m}^{-3} \text{s}^{-1}$ | Uplift of REC from the layer below                                                                                                    |
| $RISEO_{HET}$     | $\text{mmol N m}^{-3} \text{s}^{-1}$ | Uplift of HET to the layer above                                                                                                      |
| $RISEO_{REC}$     | $\text{mmol N m}^{-3} \text{s}^{-1}$ | Uplift of REC to the layer above                                                                                                      |
| $SINKI_{AKIB}$    | $\text{mmol N m}^{-2} \text{s}^{-1}$ | Sinking of AKIW to the sediments from the water above                                                                                 |
| $SINKI_{AKIW}$    | $\text{mmol N m}^{-3} \text{s}^{-1}$ | Sinking of AKIW from the layer above                                                                                                  |
| $SINKO_{AKIW}$    | $\text{mmol N m}^{-3} \text{s}^{-1}$ | Sinking of AKIW to the layer below                                                                                                    |

|                   |                        |                                                                                                                                             |
|-------------------|------------------------|---------------------------------------------------------------------------------------------------------------------------------------------|
| $SLIM_{HET}$      | -                      | Salinity limitation of HET growth                                                                                                           |
| $SLIM_{REC}$      | -                      | Salinity limitation of REC growth                                                                                                           |
| $TLIM_{HET}$      | -                      | Temperature limitation of HET growth                                                                                                        |
| $TLIM_{REC}$      | -                      | Temperature limitation of REC growth                                                                                                        |
| $WR_{HET}$        | $m s^{-1}$             | Upward rising velocity of HET                                                                                                               |
| $WR_{REC}$        | $m s^{-1}$             | Upward rising velocity of REC                                                                                                               |
| $WS_{AKI}$        | $m s^{-1}$             | Sinking velocity of AKIW                                                                                                                    |
| $\tau_{critical}$ | $N m^{-2}$             | Critical bottom shear stress value for onset of resuspension                                                                                |
| $AKIB2REC$        | $mmol N m^{-2} s^{-1}$ | Transition of benthic AKIB to REC. Depending on germination and favorable salinity conditions for REC.                                      |
| $AKIW2REC$        | $mmol N m^{-3} s^{-1}$ | Transition of pelagic AKIW to REC. Depending on germination and favorable salinity conditions for REC.                                      |
| $HET2AKIW$        | $mmol N m^{-3} s^{-1}$ | Transition of HET to AKIW                                                                                                                   |
| $REC2HET$         | $mmol N m^{-3} s^{-1}$ | Transition of recruiting cells to HET                                                                                                       |
| $SEDWS$           | $s^{-1}$               | Resuspension rate at the bottom                                                                                                             |
| $BOT$             | $m^{-1}$               | Ratio between grid cell area and grid cell volume used for transfer of mass fluxes across vertical grid cell boundaries in the water column |

**Table S5**

Values of constants in the different phosphorus limitation experiments.

|                     | <b>sPlim</b>       | <b>wPlim</b>       | <b>noOP</b>        | <b>noP</b> |
|---------------------|--------------------|--------------------|--------------------|------------|
| $KDIP [mmolP/m^3]$  | 0.05               | $1 \cdot 10^{-6}$  | 0.05               | --         |
| $KDOP [mmolP/m^3]$  | 0.1                | $2 \cdot 10^{-6}$  | --                 | --         |
| $DIPLIM_{HET/REC}$  | Eq. 4/22 Table A.3 | Eq. 4/22 Table A.3 | Eq. 4/22 Table A.3 | 1          |
| $DETPLIM_{HET/REC}$ | Eq. 5/23 Table A.3 | Eq. 5/23 Table A.3 | 0                  | 0          |

## REFERENCES

Almroth-Rosell, E., Eilola, K., Hordoir, R., Meier, H. E. M., and Hall, P. O. J.: Transport of fresh and resuspended particulate organic material in the Baltic Sea - a model study, *J. Mar. Syst.*, 87(1), 1-12, <https://doi.org/10.1016/j.jmarsys.2011.02.005>, 2011.

Almroth-Rosell, E., Eilola, K., Kuznetsov, I., Hall, P. O., and Meier, H. E. M.: A new approach to model oxygen dependent benthic phosphate fluxes in the Baltic Sea, *J. Mar. Syst.*, 144, 127-141, <https://doi.org/10.1016/j.jmarsys.2014.11.007>, 2015.

Beckmann, A., and Hense, I.: Torn between extremes: The ups and downs of phytoplankton. *Ocean Dynamics*, 54(6), 581–592, <https://doi.org/10.1007/s10236-004-0103-x>, 2004.

Eilola, K., Meier, H. E. M., and Almroth, E.: On the dynamics of oxygen, phosphorus and cyanobacteria in the Baltic Sea; a model study, *J. Mar. Syst.*, 75, 163 – 184, <https://doi.org/10.1016/j.jmarsys.2008.08.009>, 2009.

Hense, I. and Beckmann, A.: Towards a model of cyanobacteria life cycle—effects of growing and resting stages on bloom formation of N<sub>2</sub>-fixing species, *Ecol. Model.*, 195, 205 – 218, <https://doi.org/10.1016/j.ecolmodel.2005.11.018>, 2006.

Hense, I. and Beckmann, A.: The representation of cyanobacteria life cycle processes in aquatic ecosystem models, *Ecol. Model.*, 221, 2330 – 2338, <https://doi.org/10.1016/j.ecolmodel>, 2010.

Lehtimäki, J., Moisander, P., Sivonen, K., and Kononen, K.: Growth, nitrogen fixation, and nodularin production by two baltic sea cyanobacteria. *Appl Environ Microbiol.*, 63(5), 1647-1656, doi:10.1128/aem.63.5.1647-1656, 1997.
